# Supplementary material for: Genetic Diversity and Population History of a Critically Endangered Primate, the Northern Muriqui (Brachyteles hypoxanthus)
Source: PubMed Central journal article supplement (PMC3108597; doi:10.1371/journal.pone.0020722), 2011-06-03
Supplement: pone.0020722.s001.pdf [file pone.0020722.s001.pdf]

**Figure S1: Prior/Scenario settings used in the Approximate Bayesian Computation analysis.**

**Rapid**

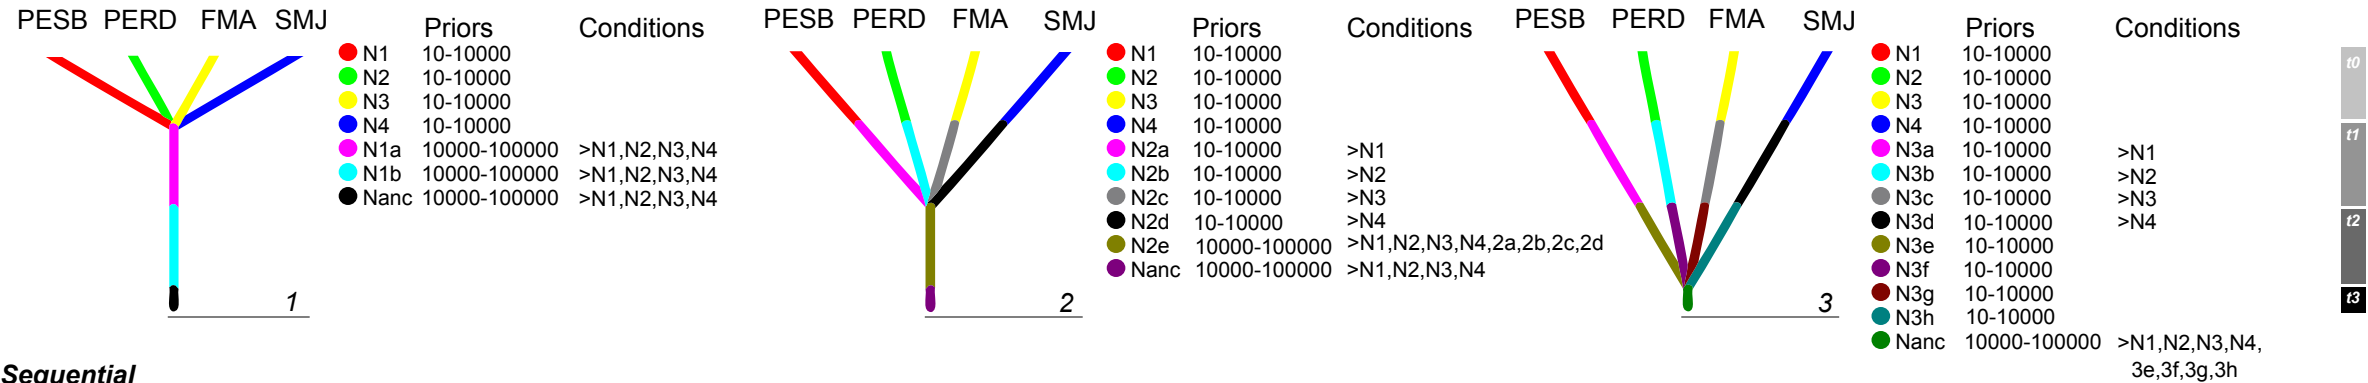

**Sequential**

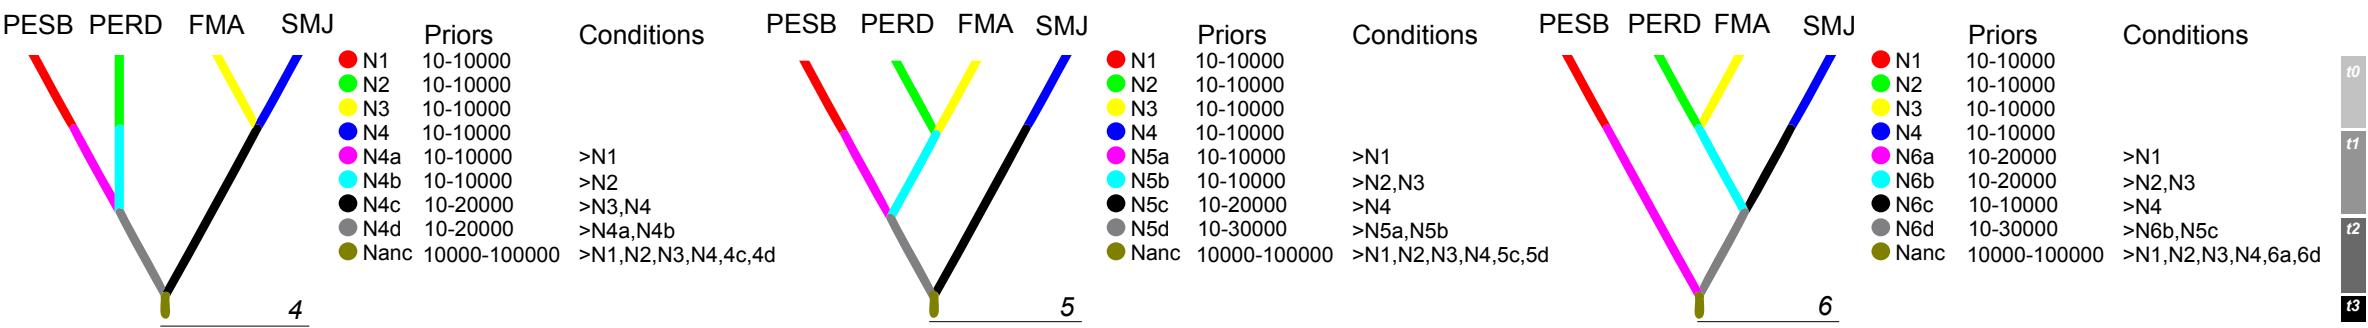

**Sequential with admixture**

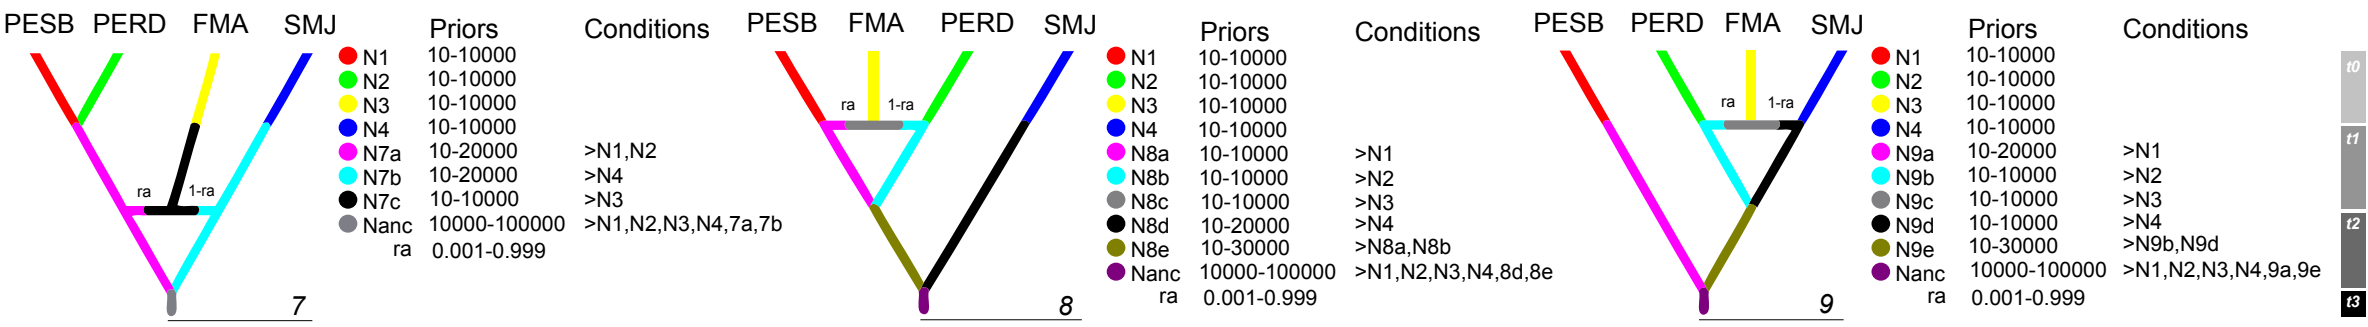

|    | Priors present | Conditions | Summary statistics                                                                                  | Mutation model priors                                             |
|----|----------------|------------|-----------------------------------------------------------------------------------------------------|-------------------------------------------------------------------|
| t0 |                |            | <b>One sample</b><br># haplotypes<br># segregating sites<br>mean pairwise differences<br>Tajima's D | <b>Min. - Max.</b><br>Mean $\mu$ (1/s/generation) 1.0E-7 - 1.0E-6 |
| t1 | 1-1000         |            | <b>Two sample</b><br># haplotypes<br># segregating sites<br>mean pairwise differences<br>Fst        | Mean kappa 25 - 45                                                |
| t2 | 1-2000*        | >t1        | <b>Admixture</b><br>Samples FMA/PESB/PERD<br>Samples FMA/PERD/SMJ                                   | Model HKY + I                                                     |
| t3 | 1-30000        | >t2        |                                                                                                     | % Inv. sites 90                                                   |

\* All Priors were Uniform, except for t2, which had a Normal distribution with mean 1500 and standard deviation 250. Time is in generations (~10 years/generation).

We followed the DIYABC manual to find appropriate prior model combinations for our data set. We used the same samples from the 106 samples data set to perform the ABC analysis though we included only the four populations shown on the diagrams above (N=90).
